# Supplementary material for: Do human screams permit individual recognition?
Source: PeerJ journal article supplement (doi:10.7717/peerj.7087), 2019-06-24
Supplement: Supplemental_Materials_S1.pdf [file Supplemental_Materials_S1.pdf]

Participant number: \_\_\_\_\_

Date: \_\_\_\_\_

Male / Female

Age: \_\_\_\_\_

Native (First) Language : \_\_\_\_\_

1. I watch movies (movie theater, internet, TV, etc.):

|           |   |   |   |       |
|-----------|---|---|---|-------|
| 1         | 2 | 3 | 4 | 5     |
| Not often |   |   |   | Often |

2. I enjoy scary movies:

|            |   |   |   |       |
|------------|---|---|---|-------|
| 1          | 2 | 3 | 4 | 5     |
| Not at all |   |   |   | A lot |

3. I watch scary or horror movies:

|           |   |   |   |       |
|-----------|---|---|---|-------|
| 1         | 2 | 3 | 4 | 5     |
| Not often |   |   |   | Often |

4. I watch TV shows where screaming often occurs:

|           |   |   |   |       |
|-----------|---|---|---|-------|
| 1         | 2 | 3 | 4 | 5     |
| Not often |   |   |   | A lot |

5. I consider myself knowledgeable about movies, the film industry, and accomplished actors.

|            |   |   |   |       |
|------------|---|---|---|-------|
| 1          | 2 | 3 | 4 | 5     |
| Not at all |   |   |   | A lot |

6. I consider myself knowledgeable about video games.

|            |   |   |   |       |
|------------|---|---|---|-------|
| 1          | 2 | 3 | 4 | 5     |
| Not at all |   |   |   | A lot |

7. I play action video games:

|           |   |   |   |       |
|-----------|---|---|---|-------|
| 1         | 2 | 3 | 4 | 5     |
| Not often |   |   |   | A lot |

**CONTINUED ON OTHER SIDE** .....
